# Supplementary material for: Genomic introgression mapping of field-derived multiple-anthelmintic resistance in Teladorsagia circumcincta
Source: PubMed Central journal article supplement (PMC5507320; doi:10.1371/journal.pgen.1006857), 2017-06-23
Supplement: pgen.1006857.s001.pdf [file pgen.1006857.s001.pdf]

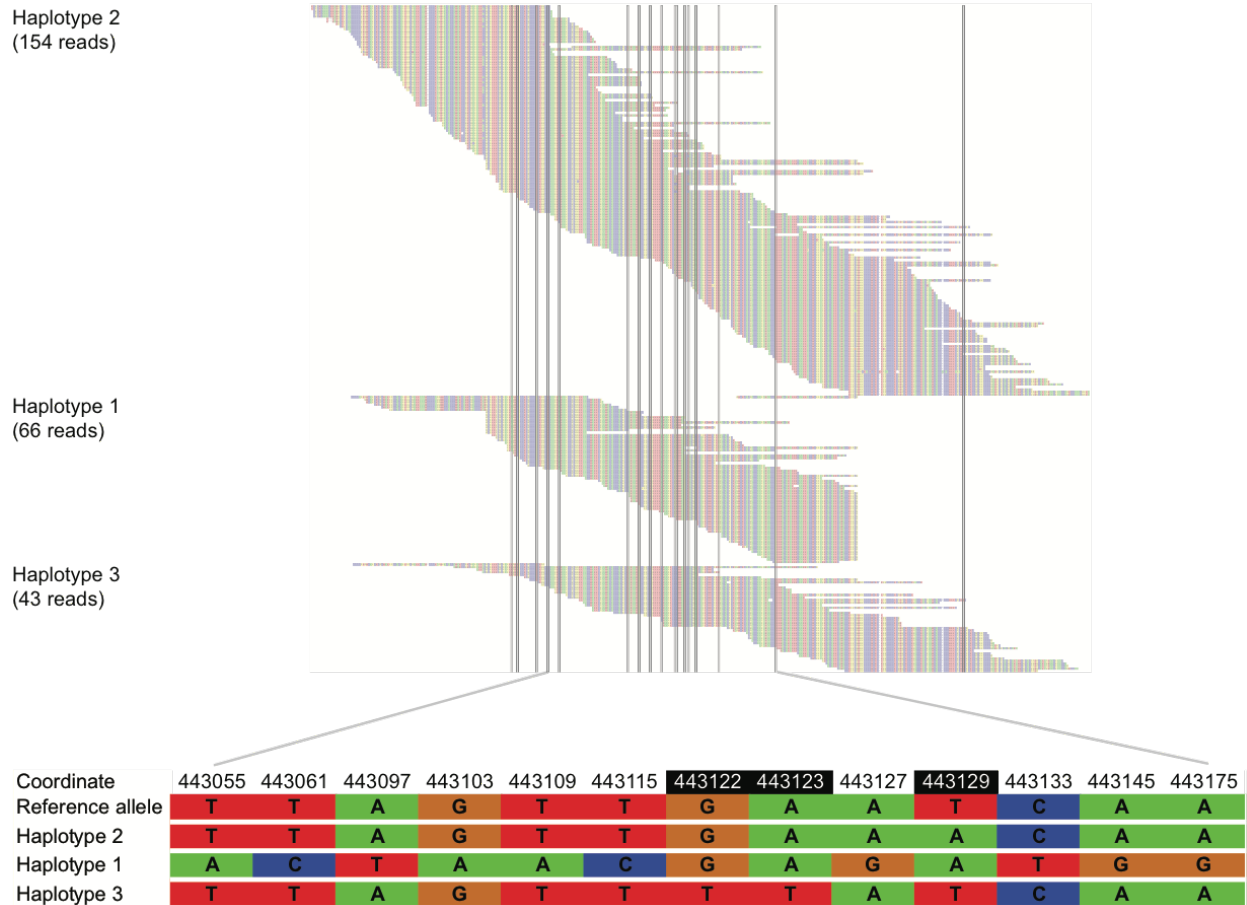

**S1 Fig. Reconstructed haplotypes of  $\beta$ -tubulin *isotype-1* in *Teladorsagia circumcincta***

**RS<sup>3</sup> population.** Read-backed phasing approach was applied over the exonic region harboring

E198L (GAa/TTa) and F200Y (tTc/tAc) variants located at Cont53:443122-443123 and

Cont53:443129, respectively.
