# Supplementary material for: Genomic introgression mapping of field-derived multiple-anthelmintic resistance in Teladorsagia circumcincta
Source: PubMed Central journal article supplement (PMC5507320; doi:10.1371/journal.pgen.1006857), 2017-06-23
Supplement: pgen.1006857.s002.pdf [file pgen.1006857.s002.pdf]

### 1° reaction

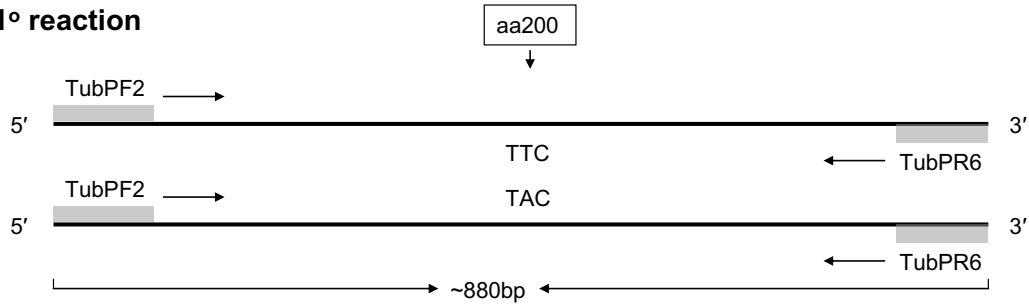

### Nested multiplex reaction

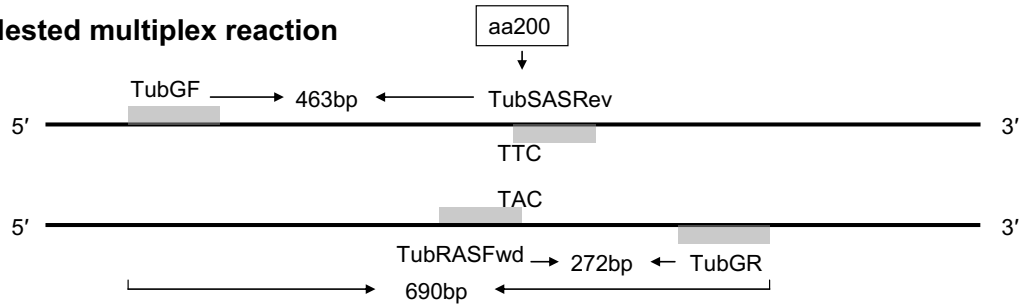

**S2 Fig. Allele-specific multiplex PCR strategy to assess the presence of a F200Y (tTc/tAc) substitution in the  $\beta$ -tubulin *isotype-1* gene in individual male *Teladorsagia circumcincta*.**
