# Supplementary material for: Genomic introgression mapping of field-derived multiple-anthelmintic resistance in Teladorsagia circumcincta
Source: PubMed Central journal article supplement (PMC5507320; doi:10.1371/journal.pgen.1006857), 2017-06-23
Supplement: pgen.1006857.s003.pdf [file pgen.1006857.s003.pdf]

|                                        |                                                                         |     |
|----------------------------------------|-------------------------------------------------------------------------|-----|
|                                        | 1                                                                       | 60  |
| S <sub>inbred</sub> [S <sub>1a</sub> ] | TTCCGCGAGGAGTATCCGGATAGAATCATGGCTTCAT <b>TTC</b> TCCGTTGTTCCATCACCAAAGG |     |
| S <sub>inbred</sub> [S <sub>1b</sub> ] | ----- <b>TTC</b> -----                                                  |     |
| RS <sup>3</sup> [R <sub>2</sub> ]      | ----- <b>TTC</b> -----                                                  |     |
| RS <sup>3</sup> [R <sub>1c</sub> ]     | ----- <b>TTC</b> -----                                                  |     |
| RS <sup>3</sup> [R <sub>1b</sub> ]     | ----- <b>TTC</b> -----G                                                 |     |
| RS <sup>3</sup> [R <sub>1a</sub> ]     | ----- <b>TTC</b> -----G                                                 |     |
|                                        | 61                                                                      | 120 |
| S <sub>inbred</sub> [S <sub>1a</sub> ] | TAATGTATCCC·ACAGCAGTCCTTTTT·GAGATCGTATTTACAGGTTCTCGAGGTGCAA             |     |
| S <sub>inbred</sub> [S <sub>1b</sub> ] | -----TA---T-----G                                                       |     |
| RS <sup>3</sup> [R <sub>2</sub> ]      | -----TA---T-----G                                                       |     |
| RS <sup>3</sup> [R <sub>1c</sub> ]     | -----TA---T-----G                                                       |     |
| RS <sup>3</sup> [R <sub>1b</sub> ]     | ---T---T-TG---TC-----C-----G-----G-----G-----G                          |     |
| RS <sup>3</sup> [R <sub>1a</sub> ]     | ---T---T-TG---TC-----C-----G-----G-----G-----G                          |     |
|                                        | 121                                                                     | 180 |
| S <sub>inbred</sub> [S <sub>1a</sub> ] | TCCATTTTACGAACTCTTCACATTGATGCGCAACCGTGAAATGTGCGAAGAAGTTATGTT            |     |
| S <sub>inbred</sub> [S <sub>1b</sub> ] | -----G-----                                                             |     |
| RS <sup>3</sup> [R <sub>2</sub> ]      | -----G-----T-----                                                       |     |
| RS <sup>3</sup> [R <sub>1c</sub> ]     | -----G-----T-----                                                       |     |
| RS <sup>3</sup> [R <sub>1b</sub> ]     | C-----CG---T---T---CA---TTT---A---G-----C---T-----                      |     |
| RS <sup>3</sup> [R <sub>1a</sub> ]     | C-----CG---T---T---CA---TTT---A---G-----C---T-----                      |     |
|                                        | 181                                                                     | 240 |
| S <sub>inbred</sub> [S <sub>1a</sub> ] | TATAGGTTTCCGATACCGTTGTGGAACCTTACAATGCCACTCTTTCTGTACACCAGTTGG            |     |
| S <sub>inbred</sub> [S <sub>1b</sub> ] | -----                                                                   |     |
| RS <sup>3</sup> [R <sub>2</sub> ]      | -----                                                                   |     |
| RS <sup>3</sup> [R <sub>1c</sub> ]     | -----                                                                   |     |
| RS <sup>3</sup> [R <sub>1b</sub> ]     | -G---A-----                                                             |     |
| RS <sup>3</sup> [R <sub>1a</sub> ]     | -G---A---C-----T---A---                                                 |     |
|                                        | 241                                                                     | 300 |
| S <sub>inbred</sub> [S <sub>1a</sub> ] | TTGAAAATACCGAT <b>GAAACATTC</b> TGCATCGATAATGAAGCTCTGTACGATATCTGCTTCC   |     |
| S <sub>inbred</sub> [S <sub>1b</sub> ] | ----- <b>GAA</b> --- <b>TTC</b> -----                                   |     |
| RS <sup>3</sup> [R <sub>2</sub> ]      | ----- <b>TTA</b> --- <b>TTC</b> -----                                   |     |
| RS <sup>3</sup> [R <sub>1c</sub> ]     | ----- <b>GAA</b> --- <b>TAC</b> -----                                   |     |
| RS <sup>3</sup> [R <sub>1b</sub> ]     | ----- <b>GAA</b> --- <b>TAC</b> -----                                   |     |
| RS <sup>3</sup> [R <sub>1a</sub> ]     | -A---C---G <b>AAC</b> - <b>TAC</b> -T-----G-----                        |     |
|                                        | 301                                                                     | 360 |
| S <sub>inbred</sub> [S <sub>1a</sub> ] | GCACCTTAAAACACAAATCCAACCTTATGGCGATCTCAATCACTTAGGTGAGGTTTAAAT            |     |
| S <sub>inbred</sub> [S <sub>1b</sub> ] | -----T-----                                                             |     |
| RS <sup>3</sup> [R <sub>2</sub> ]      | -----T-----                                                             |     |
| RS <sup>3</sup> [R <sub>1c</sub> ]     | -----T-----                                                             |     |
| RS <sup>3</sup> [R <sub>1b</sub> ]     | -----T-----                                                             |     |
| RS <sup>3</sup> [R <sub>1a</sub> ]     | -----G-----C-TAC-T-                                                     |     |
|                                        | 361                                                                     | 420 |
| S <sub>inbred</sub> [S <sub>1a</sub> ] | ATAGGTTCTATGAATATTAGCTCAGCCATCTTTT·TAAATGATATGTATTGTGGTTTT              |     |
| S <sub>inbred</sub> [S <sub>1b</sub> ] | -----                                                                   |     |
| RS <sup>3</sup> [R <sub>2</sub> ]      | -----T---G---T-----A-----                                               |     |
| RS <sup>3</sup> [R <sub>1c</sub> ]     | -----T---G---T-----                                                     |     |
| RS <sup>3</sup> [R <sub>1b</sub> ]     | -----T---G---T-----C-----                                               |     |
| RS <sup>3</sup> [R <sub>1a</sub> ]     | ---A-CCT-·-A-G-----T-----C-C---C-C-----C-----                           |     |

**S3 Fig. ClustalW multiple alignment of selected gDNA sequence variants from the central region of the  $\beta$ -tubulin *isotype-1* gene from S<sub>inbred</sub> and RS<sup>3</sup> worms showing amino acid codon positions 167, 198 and 200 (bold), SNPs and positions of introns (shaded areas).**

For the purposes of genotyping individual male worms from  $S_{\text{inbred}}$  and  $RS^3$  populations, three “alleles” were recognized ( $S_1$ ,  $R_1$  and  $R_2$ ) and allele-specific PCR strategies designed to distinguish between these. In both  $S_1$  and  $R_2$  alleles, codon 200 encoded Phe, but in the case of the  $R_2$  allele a mutation at codon 198 resulted in a Glu/Leu substitution. In all  $R_1$  variants amino acid codon 200 encoded Tyr. Note that in order to accommodate the presence of SNPs in sequence flanking codon 200 in variants of the BZ resistant  $R_1$  allele, the allele-specific primer TubRASFWd was designed to be degenerate in three nucleotide positions (see Methods).
