# Supplementary material for: Genomic introgression mapping of field-derived multiple-anthelmintic resistance in Teladorsagia circumcincta
Source: PubMed Central journal article supplement (PMC5507320; doi:10.1371/journal.pgen.1006857), 2017-06-23
Supplement: pgen.1006857.s005.pdf [file pgen.1006857.s005.pdf]

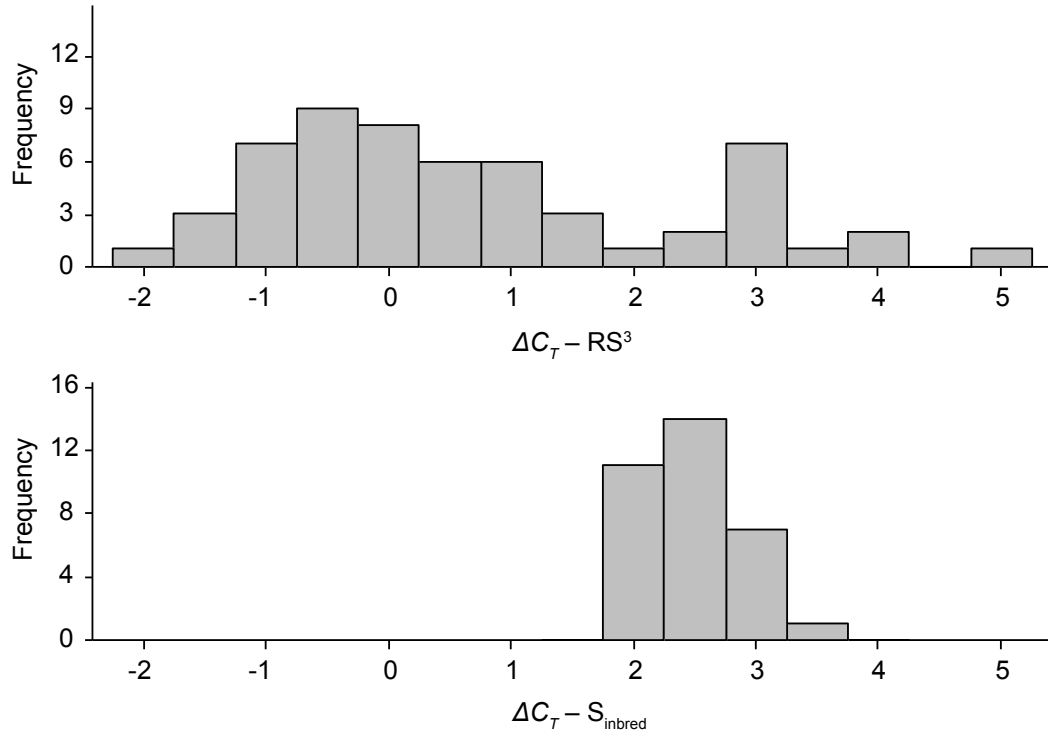

**S5 Fig. Distribution of  $\Delta C_T$  values of individual male worms from the *T. circumcincta* strains  $RS^3$  and  $S_{inbred}$ .** Note that  $\Delta C_T$  values represent the difference in the number of PCR cycles required to reach a fixed DNA threshold for the target (*Tci-pgp-9*) and reference genes (*Tci-tbb-iso-1*). Thus low  $\Delta C_T$  values indicate high template concentrations of target relative to the reference gene while high  $\Delta C_T$  values indicate low template concentrations of target relative to the reference gene.
