# Supplementary material for: Genomic introgression mapping of field-derived multiple-anthelmintic resistance in Teladorsagia circumcincta
Source: PubMed Central journal article supplement (PMC5507320; doi:10.1371/journal.pgen.1006857), 2017-06-23
Supplement: pgen.1006857.s006.pdf [file pgen.1006857.s006.pdf]

1 120  
Hap 2 ATGCTGTTTAACACAACGATTGAACAGGTTTGTACTCACGAAAGTTTCGATCAAAAAGAAAAATGGAAAAATTAATAAACCATTCTTTTCAGAATATCCGCTATGGACGTGAAAAAGT  
Hap 1 ATGCTGTTTAATACAACGATCGAACAGGTTTGTGTTT ····TGGAGAGATCTGATGAATAGAAAAAAGGAAAAATGGTAACTCTCATTTCAGAATATCCGTTATGGACGTGAAAAAGT  
Hap 4 ATGCTGTTCAACACAGCCATTGAACAGGTTTGTGTTTC ·GGGAGAGTCTTATCAACAGAAAA ····AAAAAGGAAAAATGGCTAATCTCATTTCAGAATATCCGATATGGACGTGAAAAAGT  
Hap 3 ATGCTGTTCAACACGACCATTGAACAGGTTTGTGTTTC ·GGGAGAGTCTTATCAACAGAAAA ····AAAAAGGAAAAATGGCTAATCTCATTTCAGAATATCCGATATGGACGTGAAAAAGT  
Hap 9 ATGCTTTTCAACACAACGATTGAACAGGTTTGTGTTT ·GAAGAGGTCTGATCAATAGAAAAAAGGAAAAATGAAAAATGACGTATACTTTTCAGAATATCCGCTATGGACGTGAAAAAGT  
Hap 7 ATGCTGTTTAACACAACGATTGAACAGGTTTGTGTTCTCACGAGAGCTTAAATCCGAAGAAAAATGGGAAGATGGAAAAATAACTCGGTCTTTTCAGGATATCCGCTATGGACGTGAAAAAGT  
Hap 8 ATGCTGTTCAACACAACGATTGAACAGGTTTGTGTTCTCACGAGAGGTTTGATCAAAAAGAAAAATGGAAAAACTGAAAAATAACCATTCTTTTCAGAACATCCGCTATGGACGTGAAAAAGT  
Hap 10 ATGCTCTTTAACACGACGATTGAACAGGTTTCGTTCCACGAGAGCTTTGATCAAACGAAAAATGG ·AAAACTGAAAAATAACCATTCTTTTCAGAACATCCGCTATGGACGTGAAAAAGT  
Hap 6 ATGCTGTTTAACACAACGATTGAACAGGTTTGTGTTCTCACGAGAGCTTTGATCCAAAAGAAAAATGGAAAGATGGAAAAATAACTCGTTCCTTTTAGAATATCCGCTATGGACGTGAAAAAGT  
Hap 5 ATGCTGTTTAACACAACGATTGAACAGGTTTGTGTTCTCACGAGAGCTTTGATCCAAAAGAAAAATGGAAAGATGGAAAAATAACTCGTTCCTTTTAGAATATCCGCTATGGACGTGAAAAAGT  
M L F N T T I E Q N I R Y G R E K V

121 240  
Hap 2 CACAGATGCTGAAATCACGGCGCACTCCGTAAGCAAAACGCCTACAATTTTGTGCAGTCATTCCCTGACGTGAGTTGGAACCTCGTGTGCGGTGTTAAAGCAGTGATGGTAATGGC  
Hap 1 CACAGATGCTGAAATCACAGCGGCACCTCCGCAAGCAAAACGCCTACAATTTTGTGCAGTCGTTCCCGACGTGAGTTGGAACCTCGTATTGTCGATCTTAAAGGTGGTGATCGCAATGGG  
Hap 4 CACAGATGCTGAAATCACGGCGCACTCCGCAAGCAAAACGCCTACAATTTTGTGCAGTCATTCCCTGACGTGAGTTGGAATCTCGTGTGTTGA ···TAGATGCAGTGAGTGCAATAGC  
Hap 3 CACAGATGCTGAAATCACGGCGCACTCCGCAAGCAAAACGCCTACAATTTTGTGCAGTCATTCCCTGACGTGAGTTGGAATCTCGTGTGTTGA ···TAGATGCAGTGAGTGCAATAGC  
Hap 9 CACAGATGCTGAAATCACGGCGCACTCCGTAAGCAAAACGCCTACAATTTTGTGCAGTCGTTCCCGACGTGAGTTGGAACCTCGTGTGCGGTGTTAAAGCAGTAAAGTCAATGGC  
Hap 7 CACAGATGCTGAAATCACAGCGGCACCTCCGCAAGCAAAACGCCTATAACTTTGTACAGTCGTTCCCGACGTGAGTTGGAACCTCGTGTGTTGACGTTAAAGGCAGTAAAGTCAATGGC  
Hap 8 CACAGATGCTGAAATCACGGCGCACTCCGTAAGCAAAACGCCTACAATTTTGTGCAGTCATTCCCTGACGTGAGTTGGAACCTCGTGTGTCGACCTTAAAGGCAGTGAGGCAATGCC  
Hap 10 CACAGATGCTGAAATCACGGCGCACTCCGTAAGCAAAACGCCTACAATTTTGTGCAGTCATTCCCTGACGTGAGTTGGAACCTCGTGTGTCGCGGTGTTAAAGGCAGTCAATGGC  
Hap 6 CACAGATGCTGAAATCACAGCGGCACCTCCGCAAGCAAAACGCCTATAACTTTGTACAGTCGTTCCCGACGTGAGTTGGAACCTCGTGTGTTGATGTTAAAGGCAGTGATGCAATGGC  
Hap 5 CACAGATGCTGAAATCACAGCGGCACCTCCGCAAGCAAAACGCCTATAACTTTGTACAGTCGTTCCCGACGTGAGTTGGAACCTCTTGTGTTGATGTTAGAGGCAGTGAGTGCAATACC  
T D A E I T A A L R K A N A Y N F V Q S F P D

241 360  
Hap 2 TG ······AGAGCGGGTTCGCTCGCTGGAAAAAGGTTGCAAGAGGGGGTGGTGGGAGGG ··GGTGTGGTACACCGCCCCCTCCCCCTCCTCCCA ······ [IBD77RAS11]  
Hap 1 TG ······ACGTCGGGGTTCGAGGAGCTTGGTGAACAACGCTGCAAGAAAAAGGCGAGGAGGGTATGGTCAGACACCCCTCCCTCCCA ······  
Hap 4 TGGT ····AGGCGGAGTCAGTCTAAGAAAG ····TGGTGAATGGCGCGGGAAGGAAGGAACCGCAGGGTTCCTTTCCAAATCCCCCAACCCCTTACACGGGTAACCCAAAAA  
Hap 3 TGGT ····AGGCGGAGTCAGTCTAAGAAAG ····TGGTGAATGGCGCGGGAAGGAAGGAACCGCAGGGTTCCTTTCCAAATCCCCCAACCCCTTACACGGGTAACCCAAAAA [IBD77RAS12]  
Hap 9 TGGT ····AAGCGGAGCTAGTTTGAGGAAGCGGTTGGTGAACGGAACCTGGAAGGAGAGAGCGGGAGGATGTCGTAGGATCTTCCCGA ··CGTTATCACACGGGTACCCGACAACAGG [IBD77RAS9A]  
Hap 7 TGGT ····AAGCGGAGTTAGTTTGAAGAAACCGTGGTGAACGGAACCTGGAAGGAGAAAACCGGAAGGTGTCCTTAGATTCTCTCCCAATGTTTATCACACCGGTACCCGACAATAGG [IBD77RAS2]  
Hap 8 TGGT ····AGGCGGATTCAGTTTGAGAAAGTCAATGGTGAACGCGTGTGAGAGGGGAGAGGGCAGGAGGGTGTATAGGATCAGTCCCTAA ·CGCCCTTACACGGGTACCCGACAAGAGG [IBD77RAS8A]  
Hap 10 TGGT ····GGGGGAAGTTAGTTTGAGGAAGTCAATGGTGAACGCGCTGTTGGAAGGAGAGCGCGGAGCGGTTGTTGAGGACTACTCCCAAT ·GCCCTCGCACGGGTACCCGACAAGAGG [IBD77RAS10C]  
Hap 6 TGGTGGGGGGGGGAGTTAGTTTGAGGAAGTCAATGGTGAACGCGCTGTTGGAAGGAGTGGGCGGGAGGGTGTGCTAGGACCACTTCCCAA ·CGCCCTAACACGGGTACCCGACAAGAGG  
Hap 5 TGGT ····GGGCGGAGTCA ······ ······GAAGGAGAGGGCGGGAGCGGCTCGTAGGACTACTGCCAA ·CGCTTTTACACGGGTACCCGACAAGAGG

361 480  
Hap 2 ······  
Hap 1 ······  
Hap 4 AGCCCTCCCGGGGGGGGGGAGAGGCAAGATTTCAGACAGTTTACAGCGGACGGAGTCCG ·AGCGGAACTGGGAAGTACTATAGTGTAGCCATTTAAATTGACGTTGA ······ [IBD77RAS3]  
Hap 3 ····GGCCCGTCGCGCGGCGAGAAGGCAGATCTCAGACAGGTCAGCGGAC ·GAGTCCG ·AGCGCG ·ATCTGGGACGTACTATAGTGTAGCCATTTAAATTGACGTTGA ······  
Hap 9 CCGTCGCGCGGCGAGAAGGCATATCTACAGACGTTGTCAGCGGACGAGTAGGAGCGGCTATTGTGCGATGTGGGACGTACTAT ·GTATAGTATATTTGAGCTACCGTGAATCGCTACAG  
Hap 7 CCGTCGCGCGGCGAAAAGGTTGATCTACAGAAGTTTACAGCGGAGGAGTAGGAGCGGCTATTGTGNGATGTGGGACGTACTAT ·GTATAGTATATTTGAGCTACCGTGAATCGCTACAG  
Hap 8 CCGTCGCGCGGCGAGAAGGCAGATCTACATACAGGTCAGCGGACGAGTCCGAGCGGCTATTGTGCGATGTGGGACGTACTAT ·TATAGTATATTTAAATTACCGTGAATCGCTACAG  
Hap 10 CCGTCGCGTAGCGGAGAGGCAGATCTACGGACAGGTCAGCGGACGAG ··CAGCGGCTATTGTGCGATGTGGGACGTACTATAGTATAGTATATTTAAATTGACGCTGAATCGCTACAG  
Hap 6 CCGTCGCGCGGCGAGAAGGCAGATCTACAGACGTTGTCAGCGGATGATTCGAGCGGCTATTGTGATGTGGGA ··TACTATAGTAAAGTCTATTTAAATTGACGCTGAATCGCCACAG  
Hap 5 CCGTCGCGCGGCGAGAAGGCAGATCTACGGACAGGTCAGCGGACGAGCA ····CGCGATTTTGCGATGTGGGACGTACTATAGTATAGTCTATTTAAATT ··CGAGATCGCCACAG

```

481                                                                                                                600
Hap 2  .....ACGCCGTCCACCAGTGACGTTATTGAATTGGTTTCGCCCTCTGAACTG
Hap 1  .....ACGCCCTCCACCAATGACGTTCCCTGAATCAGTTCGGCCTCTCAGCTG
Hap 4  .....CCCTTCACTTTTCTGCGTCCCTGCCTTCGCACCCGCGGGCAGGCCCTCCTGTCGGGTACCTTCTCACACCAATGACGTTCCCTGAGTTGACTCCGCCTCTCTGCTG
Hap 3  .....CCCTTCACTTCTCTGCGTCCCTGCCTTCGCACCCGCGGGCAGGCCCTCCTGTCGGGTACCTTCTCACACCAATGACGTTCCCTGAGTTGACTCCGCCTCTCTGCTG
Hap 9  TACGCGCACAGGCACGTCCCCCTCACTTGTCTGCGTCCCTT .....GCGGGCAGGCCCTCCTGTCGGGTACCTCCT ·ACACCAATGAGATCACTTAACTCCACCTCCTAGCTGTGCGC
Hap 7  TACGCGCACAGGCAAGTCCCTTCACTTGTCTGCGTCCCTT .....GCGGGCAGGCCCTCCTGTCGGGTACTTCTCCT ·ACACCAATGAGATCACTTAACTCCACCTCCTAGCTGTGCGC
Hap 8  TACGCGCACAGGCACGTCCCCCTCACTTGTCTGCGTCCCTT .....GTGGGCAGGCCCTCCTGTCGGGTACTTCTCCT ·ACACCAATGAGATCCCTTAACTCCACCTCCCAGCTGTGCGC
Hap 10 TACGCGCACAGGCACGTCCCCCTCACTTGTCTGCGTCCCTGCCATTGCATCGCGGGCAGGCCCTCCTGTCGGGTACTTCTCCT ·ACACCAATGAGGTCCTTAACTCCGCCTCCCAGCTGTGCGC
Hap 6  TACGCGCTCAGGCACGTCCCCCTCGCCTGTCTGCGTCCCTGCCTTCGCACCTGCGGGCAGGCC ·CCGTCGGGTACCCCTT ·ACACCAGTGAAGTCCTCTGACTCTGCCTTTCAGCTGTTGC [IBD77RAS5B]
Hap 5  TACGCGCTCAGGCACATCCGCTCACCTGTCTGCGTCCCTGCCTTCGCACCCGTGGGCAGGCCCTCCTGTCGGGTACCTTCTCACACCAATGACGTTCCCTGAATTGACTCCGCCTCTCTGCTG [IBD77RAS4]

601                                                                                                                654
Hap 2  CTGCAATCGCTACTGCTGGTTTCTCGTAACGAAGTCAAGC ·TCGTTTCAGGGAATCTAC
Hap 1  CTGCAATAACTACTGCTGATTCCCTCGT ·TGAAAGGTGAGC ·TTATTTTCAGGGAATCTAC [IBD77RAS7]
Hap 4  CTGCAATCACTACTGCTTGCTTCCCGTAACAAAGTCAAGC ·TCGTTTCAGGGAATTTAC
Hap 3  CTGCAATCACTACTGCTTGCTTCCCGTAACAAAGTCAAGC ·TCGTTTCAGGGAATTTAC
Hap 9  AATCACTGCTCTAAACCACTGCCCTCAACGAGCTGGACC ·TTTTTTCAGGGT .....
Hap 7  AATCACTGCCCTAAACCACTGCCCTCAACGAGCTGGACC ·TTTTTTCAGGGAATCTAC
Hap 8  AATCACTGCTCTAAACTACTGCCCTCAACGAGCTGGACCTTTTTTTCAGGGA .....
Hap 10 AATCACTGCTCTAAACTACTGCCCTCAACGAGCGAGAAC ·TTTTTTCAGGGA .....
Hap 6  AACCACCTGCTCTAAACTACTGCCCTTAACGAGCTAGATC ·TTCTTTCAGGGGATCTAC
Hap 5  CTGCAATCACTACTGCTTGCTTCCCGTAACAAAGTCAAGC ·TCGTTTCAGGGAATTTAC
G I Y

```

**S6 Fig. Multiple-alignment of partial sequences of *Tci-pgp-9-IBDA* haplotypes showing introns (shaded), amino acid translation (underlined) and locations of allele-specific reverse primers used in genotyping reactions (boxed). *Tci-pgp-9-IBDA* haplotypes were identified based on PCR clones (n=66) amplified from gDNA preparations. “Allele-specific” primers were designed to differentiate between each of the haplotypes using a nested PCR strategy to allow genotyping of individual male worms from the  $S_{\text{inbred}}$  and  $RS^3$  strains of *T. circumcincta*.**
