# Supplementary material for: Genomic introgression mapping of field-derived multiple-anthelmintic resistance in Teladorsagia circumcincta
Source: PubMed Central journal article supplement (PMC5507320; doi:10.1371/journal.pgen.1006857), 2017-06-23
Supplement: pgen.1006857.s007.pdf [file pgen.1006857.s007.pdf]

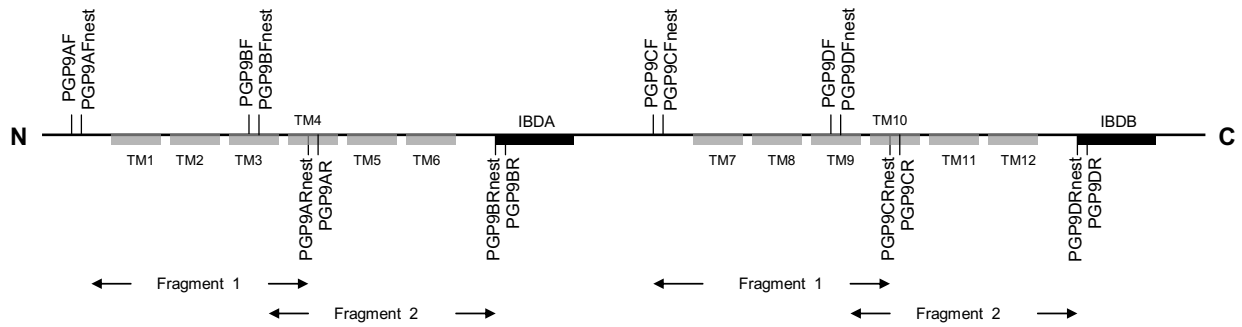

**S7 Fig. Approximate locations of the oligonucleotide primer sites used to amplify cDNA fragments encoding the N-terminal and C-terminal transmembrane regions of Tci-PGP-9 protein molecules from worms from the  $S_{inbred}$  and  $RS^3$  strains.** Forward primers are shown above the line depicting the Tci-PGP-9 molecule while reverse primers are shown below it. Grey shaded blocks indicate the relative positions of the transmembrane domains (TM1 – TM12), while black blocks indicate positions of the inter-nucleotide binding domains (IBDA & IBDB). The N-terminal fragments 1 and 2 incorporated aa34 – aa212 and aa189 – aa420 respectively while the C-terminal fragments 1 and 2 incorporated aa662 – aa874 and aa846 – aa1069 respectively.
