# Supplementary material for: Genomic introgression mapping of field-derived multiple-anthelmintic resistance in Teladorsagia circumcincta
Source: PubMed Central journal article supplement (PMC5507320; doi:10.1371/journal.pgen.1006857), 2017-06-23
Supplement: pgen.1006857.s009.pdf [file pgen.1006857.s009.pdf]

resulted in three amino acid substitutions found exclusively in RS<sup>3</sup> strain worms which included: (1) Asn79Ser; (2) Thr86Ser; (3) Asn1043Asp. The position of an amino acid substitution resulting from a mutation in *Tci-pgp-9-IBDB* which was similarly found exclusively in RS<sup>3</sup> strain worms is also shown: (4) Glu1097Gln.
