# Supplementary material for: Genomic introgression mapping of field-derived multiple-anthelmintic resistance in Teladorsagia circumcincta
Source: PubMed Central journal article supplement (PMC5507320; doi:10.1371/journal.pgen.1006857), 2017-06-23
Supplement: pgen.1006857.s010.pdf [file pgen.1006857.s010.pdf]

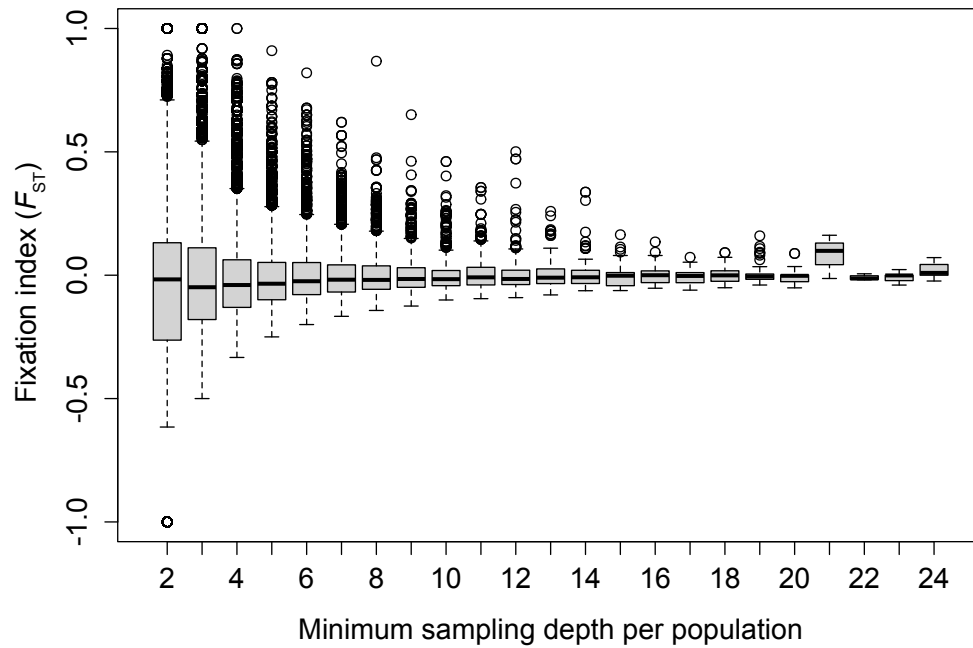

**S10 Fig. Fixation index ( $F_{ST}$ ) of ddRAD-seq derived SNP markers between IVM-screened and drug-naïve F2 mapping populations of *Teladorsagia circumcincta* (n = 24 male worms for each population). The upper and lower whiskers represent maximum and minimum values outside the interquartile range (middle 50%) excluding outliers (i.e., values greater than Q3 or less than Q1 by more than 1.5 times the interquartile range).**
