# Supplementary material for: Genomic introgression mapping of field-derived multiple-anthelmintic resistance in Teladorsagia circumcincta
Source: PubMed Central journal article supplement (PMC5507320; doi:10.1371/journal.pgen.1006857), 2017-06-23
Supplement: pgen.1006857.s011.pdf [file pgen.1006857.s011.pdf]

**S1 Table. Summary of *Teladorsagia circumcincta* genomic features and comparison to other clade V\* nematodes.**

|                                      | <i>T. circumcincta</i> | <i>H. contortus</i> | <i>N. americanus</i> | <i>C. elegans</i> |
|--------------------------------------|------------------------|---------------------|----------------------|-------------------|
| <b>Assembly statistics</b>           |                        |                     |                      |                   |
| Total number of supercontigs (>1kb)  | 81730                  | 14733               | 11713                | 7                 |
| Total length (Mb) in supercontigs    | 700.6                  | 365.1               | 244.0                | 100.3             |
| Number of N50 supercontigs           | 3153                   | 1123                | 283                  | n/a               |
| N50 supercontig length (kb)          | 47.1                   | 84.7                | 213.1                | n/a               |
| Number of N90 supercontigs           | 28621                  | 5162                | 1336                 | n/a               |
| N90 supercontig length (kb)          | 2.3                    | 13.2                | 29.2                 | n/a               |
| GC content of whole genome           | 45%                    | 43%                 | 40%                  | 35%               |
| Repetitive sequences                 | 39%                    | 38%                 | 24%                  | 19%               |
| CEGs                                 | 428 (93.4%)            | 431 (94.1%)         | 439 (95.9%)          | 458 (100%)        |
| <b>Protein-coding loci</b>           |                        |                     |                      |                   |
| Total number of protein-coding genes | 25532                  | 24747               | 19151                | 20495             |
| Avg. gene locus footprint (bp)       | 6415                   | 5455                | 4289                 | 3065              |
| Avg. number of exons per gene        | 5.2                    | 10                  | 6.4                  | 6.4               |
| Avg. exon size (bp)                  | 122                    | 123                 | 125                  | 230               |
| Avg. intron size (bp)                | 1364                   | 445                 | 642                  | 339               |
| Avg. intergenic space (bp)           | 11938                  | 7821                | 6631                 | 2109              |

\* Phylogeny based on Blaxter et al. (1998)
