# Supplementary material for: Genomic introgression mapping of field-derived multiple-anthelmintic resistance in Teladorsagia circumcincta
Source: PubMed Central journal article supplement (PMC5507320; doi:10.1371/journal.pgen.1006857), 2017-06-23
Supplement: pgen.1006857.s012.pdf [file pgen.1006857.s012.pdf]

**S2 Table. Amino acid composition (%)**

| Amino Acid |     | <i>T. circumcincta</i> | <i>N. americanus</i> | <i>C. elegans</i> |
|------------|-----|------------------------|----------------------|-------------------|
| F          | Phe | 3.9                    | 4.2                  | 4.5               |
| S          | Ser | 7.3                    | 7.8                  | 8.2               |
| T          | Thr | 5.6                    | 5.6                  | 5.9               |
| N          | Asn | 4.0                    | 4.2                  | 4.8               |
| K          | Lys | 5.9                    | 5.7                  | 6.3               |
| E          | Glu | 6.8                    | 6.7                  | 6.7               |
| Y          | Tyr | 3.1                    | 3.0                  | 3.1               |
| V          | Val | 6.7                    | 6.7                  | 6.2               |
| Q          | Gln | 3.8                    | 3.9                  | 4.2               |
| M          | Met | 2.7                    | 2.6                  | 2.6               |
| C          | Cys | 2.1                    | 2.2                  | 2.0               |
| L          | Leu | 8.6                    | 8.9                  | 8.5               |
| A          | Ala | 7.4                    | 7.1                  | 6.5               |
| W          | Typ | 1.2                    | 1.1                  | 1.1               |
| P          | Pro | 5.3                    | 5.1                  | 5.1               |
| H          | His | 2.4                    | 2.4                  | 2.3               |
| D          | Asp | 5.6                    | 5.4                  | 5.4               |
| I          | Ile | 5.2                    | 5.4                  | 6.0               |
| R          | Arg | 6.1                    | 6.2                  | 5.3               |
| G          | Gly | 6.2                    | 5.8                  | 5.4               |
