# Supplementary material for: Genomic introgression mapping of field-derived multiple-anthelmintic resistance in Teladorsagia circumcincta
Source: PubMed Central journal article supplement (PMC5507320; doi:10.1371/journal.pgen.1006857), 2017-06-23
Supplement: pgen.1006857.s014.pdf [file pgen.1006857.s014.pdf]

**S4 Table. Length of the *Teladorsagia circumcincta* genome and coding sequences (CDS) that are considered “callable” based on mapping coverage and quality.**

| Number of bases                          | All genomic regions |         |           |         | CDS                 |         |          |         |
|------------------------------------------|---------------------|---------|-----------|---------|---------------------|---------|----------|---------|
|                                          | $S_{\text{inbred}}$ |         | $RS^3$    |         | $S_{\text{inbred}}$ |         | $RS^3$   |         |
| Total reference                          | 700607159           |         | 700607159 |         | 16445831            |         | 16445831 |         |
| Total Ns                                 | 124497389           | (17.8%) | 124497389 | (17.8%) | 0                   | (0.0%)  | 0        | (0.0%)  |
| No coverage                              | 670582              | (0.1%)  | 2265770   | (0.3%)  | 7978                | (0.0%)  | 13731    | (0.1%)  |
| Low coverage <sup>a</sup>                | 1473974             | (0.2%)  | 9431101   | (1.3%)  | 12161               | (0.1%)  | 92656    | (0.6%)  |
| Excessive coverage <sup>b</sup>          | 6735180             | (1.0%)  | 7640561   | (1.1%)  | 255575              | (1.6%)  | 347097   | (2.1%)  |
| Poor mapping quality <sup>c</sup>        | 39362345            | (5.6%)  | 68975368  | (9.8%)  | 360944              | (2.2%)  | 971608   | (5.9%)  |
| Callable                                 | 527867689           | (75.3%) | 487796970 | (69.6%) | 15815852            | (96.2%) | 15027418 | (91.4%) |
| Callable in both strains                 | 482349949           | (68.8%) | 482349949 | (68.8%) | 14892959            | (90.6%) | 14892959 | (90.6%) |
| Callable in both strains (coverage >25x) | 316492511           | (45.2%) | 316492511 | (45.2%) | 11671009            | (71.0%) | 11671009 | (71.0%) |

<sup>a</sup> Depth of less than 4× was considered low coverage.

<sup>b</sup> Depth of more than [median depth + (median absolute deviation × 1.4826) × 3] was considered excessive coverage.

<sup>c</sup> For loci above 10× coverage, if the fraction of reads with mapping quality < 2 exceeded 10% at a base, the site was considered poorly mapped.
