# Supplementary material for: Genomic introgression mapping of field-derived multiple-anthelmintic resistance in Teladorsagia circumcincta
Source: PubMed Central journal article supplement (PMC5507320; doi:10.1371/journal.pgen.1006857), 2017-06-23
Supplement: pgen.1006857.s015.pdf [file pgen.1006857.s015.pdf]

**S5 Table. Number of fixed and segregating bi-allelic SNPs in *Teladorsagia circumcincta***

**S<sub>inbred</sub> and RS<sup>3</sup> strains.** Total bi-allelic SNPs = 17,176,467. (a) Differentially fixed SNPs; (b) private SNPs in S<sub>inbred</sub> population; (c) private SNPs in RS<sup>3</sup> population. “Reference allele” for a given SNP refers to the nucleotide base on the S<sub>inbred</sub> genome assembly at the SNP's position. “Polymorphic” refers to the presence of both the reference and the alternative alleles at a given site in the respective population.

|                 |                               | S <sub>inbred</sub>         |                            |                               |
|-----------------|-------------------------------|-----------------------------|----------------------------|-------------------------------|
|                 |                               | Fixed<br>(reference allele) | Polymorphic                | Fixed<br>(alternative allele) |
|                 |                               | 9,765,015<br>56.85%         | 7,354,798<br>42.82%        | 56,654<br>0.33%               |
| RS <sup>3</sup> | Fixed<br>(reference allele)   | 426,276<br>2.48%            | (b)<br>422,182<br>2.46%    | (a)<br>4,094<br>0.02%         |
|                 | Polymorphic                   | 16,489,377<br>96.00%        | (c)<br>9,617,901<br>55.99% | (c)<br>19,932<br>0.12%        |
|                 | Fixed<br>(alternative allele) | 260,814<br>1.52%            | (a)<br>147,114<br>0.86%    | (b)<br>81,072<br>0.47%        |
|                 |                               |                             |                            | 32,628<br>0.19%               |
