# Supplementary material for: Genomic introgression mapping of field-derived multiple-anthelmintic resistance in Teladorsagia circumcincta
Source: PubMed Central journal article supplement (PMC5507320; doi:10.1371/journal.pgen.1006857), 2017-06-23
Supplement: pgen.1006857.s019.pdf [file pgen.1006857.s019.pdf]

**S9 Table. Prevalence of  $\beta$ -tubulin genotypes in inbred anthelmintic susceptible ( $S_{inbred}$ ) and multiple-anthelmintic resistant ( $RS^3$ ) populations of *Teladorsagia circumcincta*.**

| Genotype*<br>(aa198/aa200)      | Worm population     |               |
|---------------------------------|---------------------|---------------|
|                                 | $S_{inbred}$ (n=94) | $RS^3$ (n=79) |
| $S_{198}S_{198}/S_{200}S_{200}$ | 94 (100.0%)         | 0 (0.0%)      |
| $S_{198}S_{198}/R_{200}R_{200}$ | 0 (0.0%)            | 63 (79.7%)    |
| $S_{198}R_{198}/S_{200}R_{200}$ | 0 (0.0%)            | 13 (16.5%)    |
| $R_{198}R_{198}/S_{200}S_{200}$ | 0 (0.0%)            | 3 (3.8%)      |

\*  $S_{198}$  – Glu in aa position 198;  $R_{198}$  – Leu in aa position 198;  $S_{200}$  – Phe in aa position 200;

$R_{200}$  – Tyr in aa position 200
