# Supplementary material for: Genomic introgression mapping of field-derived multiple-anthelmintic resistance in Teladorsagia circumcincta
Source: PubMed Central journal article supplement (PMC5507320; doi:10.1371/journal.pgen.1006857), 2017-06-23
Supplement: pgen.1006857.s020.pdf [file pgen.1006857.s020.pdf]

**S10 Table. Summary of  $\Delta C_T$  values in relation to the occurrence of *Tci-pgp-9-IBDA* haplotypes in male worms of the RS<sup>3</sup> strain of *Teladorsagia circumcincta*.**

| Number of worms | IBDA haplotypes present | IBDA haplotypes not present | Mean $\Delta C_T$ value (range) |
|-----------------|-------------------------|-----------------------------|---------------------------------|
| 18              | Haplotype 3             |                             | -0.09* (-1.78 – 1.03)           |
| 20              | Haplotype 6             | Haplotype 3                 | 0.33* (-1.62 – 2.97)            |
| 11              | Haplotype 10            |                             | -0.84* (-1.78 – 0.25)           |
| 8               | Haplotype 2             | Haplotypes 3, 6, 10         | 3.46 (2.52 – 5.08)              |
| 5               | Haplotype 8             | Haplotypes 3, 6, 10         | 3.23 (2.63 – 4.07)              |
| 5               | Haplotype 9             | Haplotypes 3, 6, 10         | 3.34 (2.52 – 5.08)              |

\* Significantly lower than  $\Delta C_T$  values from S<sub>inbred</sub> worms overall (two-sample *t*-test, *P* < 0.001)
