# Supplementary material for: Genomic introgression mapping of field-derived multiple-anthelmintic resistance in Teladorsagia circumcincta
Source: PubMed Central journal article supplement (PMC5507320; doi:10.1371/journal.pgen.1006857), 2017-06-23
Supplement: pgen.1006857.s022.pdf [file pgen.1006857.s022.pdf]

**S12 Table. Genes displaying a minimum  $F_{ST}$  z-score of 2.5 in both the introgression and the F2 mapping experiments**

| Contig ID | Gene ID      |                                                  | $F_{ST}$ z-score      |                | Minimum score |
|-----------|--------------|--------------------------------------------------|-----------------------|----------------|---------------|
|           |              |                                                  | Introgression mapping | IVM F2 mapping |               |
| Cont209   | TELCIR_02985 | Triacylglycerol lipase                           | 3.4                   | 4.5            | 3.4           |
| Cont209   | TELCIR_02988 | Triacylglycerol lipase                           | 3.3                   | 4.5            | 3.3           |
| Cont228   | TELCIR_03131 | ABC transporter ( <i>Tci-mrp-6</i> )             | 4.2                   | 3.0            | 3.0           |
| Cont228   | TELCIR_03132 | Hypothetical protein                             | 3.7                   | 3.0            | 3.0           |
| Cont133   | TELCIR_02272 | Conserved domain protein                         | 2.8                   | 4.0            | 2.8           |
| Cont133   | TELCIR_02271 | 6-phosphofructo-2-kinase                         | 2.8                   | 4.0            | 2.8           |
| Cont6655  | TELCIR_15612 | Conserved domain protein                         | 2.8                   | 4.5            | 2.8           |
| Cont6655  | TELCIR_15613 | Putative lipoyl synthase                         | 2.7                   | 4.5            | 2.7           |
| Cont209   | TELCIR_02984 | Conserved domain protein                         | 2.6                   | 4.5            | 2.6           |
| Cont228   | TELCIR_03125 | Hypothetical protein                             | 2.6                   | 3.0            | 2.6           |
| Cont6655  | TELCIR_15611 | Ground-like domain protein                       | 2.6                   | 4.5            | 2.6           |
| Cont228   | TELCIR_03126 | Hypothetical protein                             | 2.6                   | 3.0            | 2.6           |
| Cont133   | TELCIR_02273 | Hypothetical protein                             | 2.5                   | 4.0            | 2.5           |
| Cont5     | TELCIR_00170 | Ligand-gated anion channel ( <i>Tci-lgc-54</i> ) | 5.0                   | 2.5            | 2.5           |
| Cont5     | TELCIR_00169 | Conserved domain protein                         | 4.7                   | 2.5            | 2.5           |
| Cont5     | TELCIR_00168 | PHD-finger                                       | 4.4                   | 2.5            | 2.5           |
| Cont5     | TELCIR_00174 | Conserved hypothetical protein                   | 3.8                   | 2.5            | 2.5           |
| Cont5     | TELCIR_00167 | Protein-tyrosine phosphatase                     | 3.7                   | 2.5            | 2.5           |
