# Supplementary material for: Genomic introgression mapping of field-derived multiple-anthelmintic resistance in Teladorsagia circumcincta
Source: PubMed Central journal article supplement (PMC5507320; doi:10.1371/journal.pgen.1006857), 2017-06-23
Supplement: pgen.1006857.s024.pdf [file pgen.1006857.s024.pdf]

**S14 Table. Summary of experimental design showing lamb treatment groups, *T. circumcincta* infecting doses, final group sizes (*N*), ivermectin treatment status and 2<sup>o</sup> anthelmintic treatments applied.**

| Group | Infecting dose<br>( $R_{\text{par}} \times S_{\text{inbred}} F_2$ ) | <i>N</i> | Ivermectin<br>treatment<br>(day 27 p.i.) | Mean FEC* [range]<br>(day 30 p.i.) | 2 <sup>o</sup> treatment<br>(day 31 p.i.) |
|-------|---------------------------------------------------------------------|----------|------------------------------------------|------------------------------------|-------------------------------------------|
| 1a    | 8000                                                                | 9        | No                                       | 718 [100-2500]                     | Untreated                                 |
| 1b    | 8000                                                                | 9        | No                                       | 713 [100-1800]                     | Oxfendazole                               |
| 1c    | 8000                                                                | 9        | No                                       | 706 [100-2000]                     | Levamisole                                |
| 2a    | 16000                                                               | 9        | Yes                                      | 282 [0-1100]                       | Untreated                                 |
| 2b    | 16000                                                               | 9        | Yes                                      | 270 [0-1500]                       | Oxfendazole                               |
| 2c    | 16000                                                               | 9        | Yes                                      | 315 [100-900]                      | Levamisole                                |

\* FEC data presented as back-transformed square-root means with range of actual counts in parentheses.
