# Supplementary material for: Genomic introgression mapping of field-derived multiple-anthelmintic resistance in Teladorsagia circumcincta
Source: PubMed Central journal article supplement (PMC5507320; doi:10.1371/journal.pgen.1006857), 2017-06-23
Supplement: pgen.1006857.s025.pdf [file pgen.1006857.s025.pdf]

**S15 Table. Between-infection-group comparisons of post-mortem worm burdens, following oxfendazole or levamisole treatment, in host animals infected with ivermectin-screened or unscreened  $R_{\text{par}} \times S_{\text{inbred}}$   $F_2$  generation *Teladorsagia circumcincta*.**

| 2 <sup>o</sup> treatment | <i>N</i> | <i>T. circumcincta</i> infection group | Worm count relative to untreated control <sup>a</sup> |
|--------------------------|----------|----------------------------------------|-------------------------------------------------------|
| Oxfendazole              | 9        | Unscreened                             | 0.333                                                 |
|                          | 9        | IVM-screened                           | 0.413 <sup>b</sup>                                    |
| Levamisole               | 9        | Unscreened                             | 0.305                                                 |
|                          | 9        | IVM-screened                           | 0.329 <sup>b</sup>                                    |

<sup>a</sup> To permit between-infection-group comparisons of post-treatment worm burdens (i.e., IVM-screened vs. unscreened populations), counts were adjusted for differences in initial worm population size by dividing them by the back-transformed square-root mean count of the untreated control group for that population. The “standardised counts” were then analysed by ANOVA after square root transformation. Pre-planned pair-wise comparisons were made using least significant differences (LSD) on the transformed scale.

<sup>b</sup> Within 2<sup>o</sup> treatment groups, no significant differences in “standardised worm counts” between IVM-screened and unscreened *T. circumcincta* populations. LSD ( $P < 0.05$ ) = 0.235 for both within-treatment comparisons.
