# Supplementary material for: Genomic introgression mapping of field-derived multiple-anthelmintic resistance in Teladorsagia circumcincta
Source: PubMed Central journal article supplement (PMC5507320; doi:10.1371/journal.pgen.1006857), 2017-06-23
Supplement: pgen.1006857.s026.pdf [file pgen.1006857.s026.pdf]

**S16 Table. Summary of sequenced gDNA and mRNA libraries**

| Source | Platform       | Strain              | Library type            | Mean length (bp) | Read counts | Total yield (Mb) | SRA Accession No.                                                                                                                                                    |
|--------|----------------|---------------------|-------------------------|------------------|-------------|------------------|----------------------------------------------------------------------------------------------------------------------------------------------------------------------|
| gDNA   | Roche/454      | S <sub>inbred</sub> | Fragment                | 377              | 11120366    | 4192             | SRX499428                                                                                                                                                            |
| gDNA   | Roche/454      | S <sub>inbred</sub> | Paired-end (3kb insert) | 377              | 14921987    | 5626             | SRX499427<br>SRX499429<br>SRX499430                                                                                                                                  |
| gDNA   | Roche/454      | S <sub>inbred</sub> | Paired-end (8kb insert) | 323              | 3022915     | 976              | SRX499431<br>SRX499432                                                                                                                                               |
| gDNA   | Illumina GAll  | S <sub>inbred</sub> | Paired-end              | 75               | 54958674    | 4122             | SRX2011764<br>SRX2011765                                                                                                                                             |
| gDNA   | Illumina MiSeq | S <sub>inbred</sub> | Paired-end              | 150              | 11811572    | 1772             | SRX1561328                                                                                                                                                           |
| gDNA   | Illumina HiSeq | S <sub>inbred</sub> | Paired-end              | 125              | 474430546   | 59304            | SRX2018770                                                                                                                                                           |
| gDNA   | Illumina HiSeq | RS <sup>3</sup>     | Paired-end              | 100              | 198700496   | 19870            | SRX1507699                                                                                                                                                           |
| gDNA   | Illumina HiSeq | RS <sup>3</sup>     | Paired-end              | 125              | 368669324   | 46084            | SRX2018769                                                                                                                                                           |
| gDNA   | Illumina MiSeq | N/A                 | Single-end ddRAD-seq    | 150              | 26404702    | 3961             | SRX2911816<br>SRX2911817<br>SRX2911818<br>SRX2911819<br>SRX2911820<br>SRX2911821<br>SRX2911822<br>SRX2911823<br>SRX2911824<br>SRX2911825<br>SRX2911826<br>SRX2911827 |
| mRNA   | Roche/454      | S <sub>inbred</sub> | Fragment                | 232              | 491725      | 114              | SRX089125                                                                                                                                                            |
| mRNA   | Roche/454      | RS <sup>3</sup>     | Fragment                | 216              | 411596      | 89               | SRX090067                                                                                                                                                            |
| mRNA   | Illumina HiSeq | S <sub>inbred</sub> | Paired-end              | 100              | 154058344   | 15406            | SRX1507698                                                                                                                                                           |
| mRNA   | Illumina HiSeq | RS <sup>3</sup>     | Paired-end              | 100              | 144934812   | 14494            | SRX1507697                                                                                                                                                           |
