# Supplementary material for: Genomic introgression mapping of field-derived multiple-anthelmintic resistance in Teladorsagia circumcincta
Source: PubMed Central journal article supplement (PMC5507320; doi:10.1371/journal.pgen.1006857), 2017-06-23
Supplement: pgen.1006857.s027.pdf [file pgen.1006857.s027.pdf]

**S17 Table. Allele-specific reverse PCR primers used in *Tci-pgp-9-IBDA* genotyping reactions**

| Haplotype | Primer Name | Primer Sequence                | Product Size |
|-----------|-------------|--------------------------------|--------------|
| 1         | IBD77RAS7   | 5' GTAGATTCCCTGAAATAAGCTCAC 3' | 455bp        |
| 2         | IBD77RAS11  | 5' CTTTTCCAGCGACGACCCGC 3'     | 286bp        |
| 3 (& 4)   | IBD77RAS12  | 5' AGCGCCATTCCACCACTTTCTTAG 3' | 292bp        |
| 4         | IBD77RAS3   | 5' CTGTCTGAAATCTGCCTTCTCC 3'   | 403bp        |
| 5         | IBD77RAS4   | 5' CGTACTGTGGCGATCTCGA 3'      | 458bp        |
| 6         | IBD77RAS5B  | 5' AGCTGAAAGGCAGAGTCAGAG 3'    | 610bp        |
| 7         | IBD77RAS2   | 5' CGGTGTGATAAACATTGGGAGAG 3'  | 359bp        |
| 8         | IBD77RAS8A  | 5' TCCTGCCCTCTCCCTCTCAAC 3'    | 323bp        |
| 9         | IBD77RAS9A  | 5' GTGTGATAACGTCGGGGAAGATC 3'  | 356bp        |
| 10        | IBD77RAS10C | 5' GAGTAGTCCTACAACACCGCT 3'    | 341bp        |
